# Supplementary material for: Chromium-containing organometallic nanomaterials for non-linear optics
Source: Royal Society of Chemistry journal article supplement (doi:10.1039/b513465j), 2006-01-01
Supplement: b513465j.pdf [file b513465j.pdf]

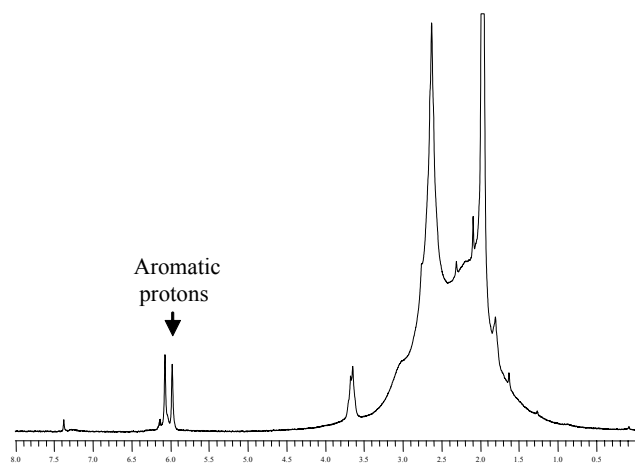

Fig 1S. <sup>1</sup>H NMR spectrum of CrPAN prepared from bis(benzene)chromium (CD<sub>3</sub>CN solution)

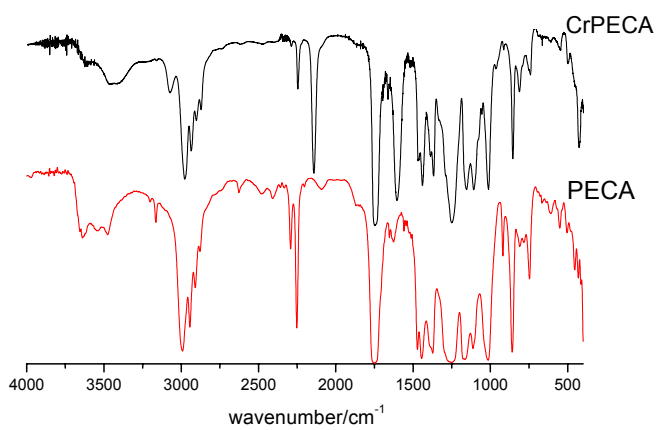

Fig. 2S. The IR spectra of CrPECA and PECA
